# Supplementary material for: Biochar particle aggregation in soil pore water: the influence of ionic strength and interactions with pyrene
Source: Royal Society of Chemistry journal article supplement (doi:10.1039/c9em00277d), 2019-01-01
Supplement: c9em00277d1.pdf [file c9em00277d1.pdf]

# Biochar particle aggregation in soil pore water: influence of ionic strength and interactions with pyrene

## Supporting Information

Stephanie Castan<sup>a</sup>, Gabriel Sigmund<sup>a,b,c</sup>, Thorsten Hüffer<sup>a</sup>, Thilo Hofmann<sup>a\*</sup>

<sup>a</sup> Department of Environmental Geosciences, Centre for Microbiology and Environmental Systems Science, University of Vienna, Althanstraße 14, 1090 Wien; \*thilo.hofmann@univie.ac.at; Tel: +43-1-4277-53320

<sup>b</sup> Agroscope, Environmental Analytics, Reckenholzstrasse 191, CH-8046 Zurich, Switzerland

<sup>c</sup> Ithaka Institute for Carbon Strategies, Ancienne Eglise 9, Arbaz 1974, Switzerland

**Table S1:** Selected pyrene properties.<sup>1,2</sup>

| Pyrene                              |          |
|-------------------------------------|----------|
| CAS – No.                           | 129-00-0 |
| Molar mass [Da]                     | 202.26   |
| Log K <sub>ow</sub>                 | 4.88     |
| Solubility [µg/L]                   | 135      |
| Molar volume [cm <sup>3</sup> /mol] | 159.3    |

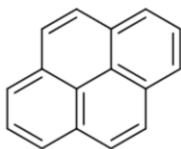

Sorption isotherms were fitted with the Polanyi-Manes model (Equation 1), which is applicable for isotherm fits over large concentration ranges.<sup>2,3</sup>

**Equation 1**

$$\log C_s = \log Q^{max} + a * \left( \frac{RT \ln \left( \frac{S_w}{C_{aq}} \right)}{V_s} \right)^d$$

- C<sub>s</sub>..... mass of sorbate adsorbed per unit mass of sorbent
- C<sub>aq</sub>..... sorbate concentration in aqueous phase
- Q<sup>max</sup>..... sorption capacity
- a, d..... fitting parameters
- R..... universal gas constant
- T..... absolute temperature
- V<sub>s</sub>..... molar volume of solute
- S<sub>w</sub>..... water solubility

For comparison among different isotherms, individual sorption coefficients (K<sub>d</sub>, L/kg) were calculated at aqueous concentrations of 0.1, 1 and 10 µg/L. Standard deviations were calculated from duplicate measurements and unpaired t-tests were performed to test whether compared values are statistically different on a p < 0.05 level.

**Figure S1:** Sorption isotherms after 28 days in MQ (●) and 0.01 M CaCl<sub>2</sub> (■).

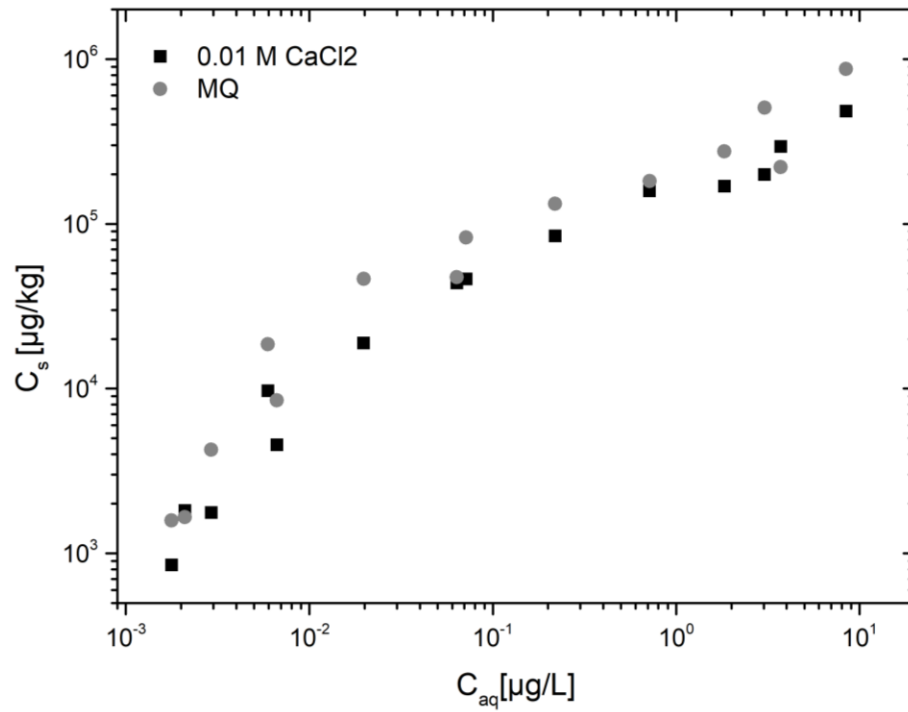

**Figure S2:** Sorption isotherms in 0.01 M CaCl<sub>2</sub> after 24 hours (●) and 28 days (■).

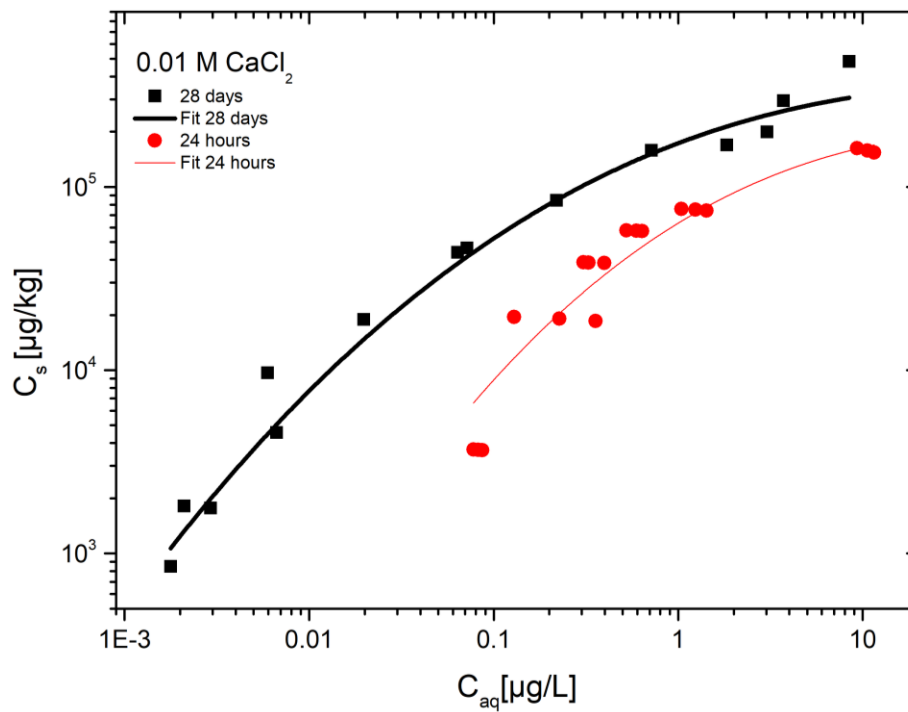

1. Chemspider database, Pyrene, *Royal Society of Chemistry* Available at: [www.chemspider.com](http://www.chemspider.com). (Accessed: 27th March 2019)
2. Yang, K., Zhu, L. & Xing, B., Adsorption of Polycyclic Aromatic Hydrocarbons by Carbon Nanomaterials, *Environ. Sci. Technol.*, 2006, **40**, 1855–1861
3. Kah, M., Zhang, X., Jonker, M. T. O. & Hofmann, T., Measuring and modeling adsorption of PAHs to carbon nanotubes over a six order of magnitude wide concentration range, *Environ. Sci. Technol.*, 2011, **45**, 6011–6017
